# Supplementary material
Source: publisher figshare collection journal article supplement (https://sage.figshare.com/ndownloader/files/22412508)
Supplement: Supplementary file 1 [file 22412508]

Online Supplementary Table 1. Literature search carried out in the main databases obtained from primary studies

| <b><i>DATABASES</i></b> | <b><i>SEARCH STRATEGY</i></b>                                                                                                                                                                                                                                                                                                   |
|-------------------------|---------------------------------------------------------------------------------------------------------------------------------------------------------------------------------------------------------------------------------------------------------------------------------------------------------------------------------|
| MEDLINE                 | Implementation and (evidence-based practice) and nursing and (qualitative studies) and facilitators                                                                                                                                                                                                                             |
| CINAHL                  | Implementation and evidence-based practice and nursing and qualitative studies and facilitators                                                                                                                                                                                                                                 |
| SCOPUS                  | Facilitators AND implementation AND evidence-based practice AND nursing AND qualitative studies                                                                                                                                                                                                                                 |
| PUBMED                  | (((((Health Plan Implementation) OR "Health Plan Implementation"[Mesh]) OR implementation)) AND (((evidence-based practice) OR "Evidence-Based Practice"[Mesh]) OR Evidence-Based Nursing) OR "Evidence-Based Nursing"[Mesh])) AND ((nursing) OR "Nursing"[Mesh])) AND (("Qualitative Research"[Mesh]) OR qualitative research) |

|          |                                                                                                                                                                                                               |
|----------|---------------------------------------------------------------------------------------------------------------------------------------------------------------------------------------------------------------|
| PROQUEST | Perceptions and experiences and opinions and descriptions and nurses and factors and facilitators and context and implementation and evidence-based nursing practice and evidence use and qualitative studies |
|----------|---------------------------------------------------------------------------------------------------------------------------------------------------------------------------------------------------------------|

Online Supplementary Table 2. Overview of the primary articles

|   | AUTHOR                                      | OBJECTIVE                                                                                                                                                                                       | DESIGN/METHOD      |                                            |                                            |                        |                               |                                                                                              |
|---|---------------------------------------------|-------------------------------------------------------------------------------------------------------------------------------------------------------------------------------------------------|--------------------|--------------------------------------------|--------------------------------------------|------------------------|-------------------------------|----------------------------------------------------------------------------------------------|
|   | AUTHOR (YEAR)                               | RESEARCH OBJECTIVES                                                                                                                                                                             | METHODOLOGY        | DATA COLLECTION METHOD                     | SETTING                                    | REGION                 | DATA ANALYSIS                 | TYPE OF EVIDENCE-BASED PRACTICE IMPLEMENTATION                                               |
| 1 | Adams (2001)                                | To examine the perceptions about barriers to the implementation of evidence-based practice among orthopaedic nurses. To examine some of the practicalities of carrying out a qualitative study. | PHENOMENOLOGICAL   | IN-DEPTH INTERVIEWS                        | ORTHOPAEDIC HOSPITAL                       | UNITED KINGDOM         | DISCOURSE ANALYSIS            | GENERAL                                                                                      |
| 2 | Adib-Hajbaghery (2007)                      | To explore the factors that influence the implementation of evidence-based nursing in Iran.                                                                                                     | GROUNDING THEORY   | IN-DEPTH INTERVIEWS AND DIRECT OBSERVATION | 3 LARGE HOSPITALS AND 1 FACULTY OF NURSING | IRAN                   | CONSTANT COMPARATIVE ANALYSIS | GENERAL                                                                                      |
| 3 | Alageel, Gulliford, McDermott et al. (2018) | To identify barriers to and facilitators of the implementation of multiple health behaviour change interventions for cardiovascular disease (CVD) risk reduction in primary care.               | QUALITATIVE DESIGN | SEMI-STRUCTURED INTERVIEWS                 | PRIMARY CARE                               | ENGLAND (SOUTH LONDON) | CONTENT ANALYSIS              | PROGRAMME FOR THE IMPLEMENTATION OF MULTIPLE INTERVENTIONS FOR CARDIOVASCULAR RISK REDUCTION |

|    |                                                 |                                                                                                                                                                                                                                                                                                                       |                    |                                        |                                                                        |                          |                                                         |                                                                                                                             |
|----|-------------------------------------------------|-----------------------------------------------------------------------------------------------------------------------------------------------------------------------------------------------------------------------------------------------------------------------------------------------------------------------|--------------------|----------------------------------------|------------------------------------------------------------------------|--------------------------|---------------------------------------------------------|-----------------------------------------------------------------------------------------------------------------------------|
| 4  | Allen, Williams, Jennings et al. (2018)         | To study the experiences of leadership change in midwifery practice.                                                                                                                                                                                                                                                  | QUALITATIVE DESIGN | QUALITATIVE INTERVIEWS AND FOCUS GROUP | LARGE THIRD-LEVEL UNIVERSITY HOSPITAL                                  | AUSTRALIA                | CONTENT ANALYSIS                                        | PAIN ASSESSMENT AND MANAGEMENT                                                                                              |
| 5  | Bahtsevani, Willman, Stoltz, & Östman (2010)    | To investigate experiences and factors of importance for the implementation of clinical practice guidelines in hospital care among nursing professionals.                                                                                                                                                             | QUALITATIVE DESIGN | IN-DEPTH INTERVIEWS                    | HOSPITALS                                                              | SOUTHERN SWEDEN          | CONTENT ANALYSIS                                        | IMPLEMENTATION OF CLINICAL PRACTICE GUIDELINES                                                                              |
| 6  | Bjartmarz, Jónsdóttir, & Hafsteinsdóttir (2017) | To determine the implementation and feasibility of the Stroke Nursing Guideline (SNG) in terms of changes in documentation and use of the guideline in the care of stroke patients on Neurological and Rehabilitation wards, barriers and facilitators, and nurses' and auxiliary nurses' view of the implementation. | MIXED DESIGN       | FOCUS GROUPS                           | REHABILITATION UNITS AND NEUROLOGY DEPARTMENT OF A UNIVERSITY HOSPITAL | ICELAND                  | CONTENT ANALYSIS                                        | NURSING GUIDELINE IN THE CARE OF PATIENTS WITH STROKE                                                                       |
| 7  | Bohman, Ericsson, & Borglin (2013)              | To explore nurses' perception of nursing research and its implementation in clinical practice.                                                                                                                                                                                                                        | QUALITATIVE DESIGN | DISCUSSION GROUPS                      | HOSPITAL (THORACIC UNITS)                                              | SOUTHEASTERN SWEDEN      | CONTENT ANALYSIS                                        | APPLICATION OF RESEARCH IN CLINICAL PRACTICE                                                                                |
| 8  | Brolliar, Moore, Thompson et al. (2016)         | To identify and explore in depth the provider perspective on factors associated with adherence to the traumatic brain injury guidelines using 19 focus groups with nurses and physicians.                                                                                                                             | QUALITATIVE DESIGN | FOCUS GROUPS                           | 5 PAEDIATRIC TRAUMA CENTRES                                            | UNITED STATES OF AMERICA | CONTENT ANALYSIS                                        | PAEDIATRIC TRAUMATIC BRAIN INJURY GUIDELINES                                                                                |
| 9  | Brown, Shewan, McDonnell, & Davies (1999)       | To explore the implementation of research-based knowledge by practice nurses in the prevention of cardiovascular disease (CVD) and stroke.                                                                                                                                                                            | MIXED DESIGN       | SEMI-STRUCTURED INTERVIEWS             | NATIONAL HEALTH SERVICE                                                | ENGLAND AND WALES        | (THEMATIC) FRAMEWORK ANALYSIS. RITCHIE & SPENCER (1995) | IMPLEMENTATION OF EVIDENCE-BASED PRACTICE IN THE PREVENTION OF CARDIOVASCULAR DISEASE AND STROKE                            |
| 10 | Burton, Fisher, & Green (2009)                  | To explore the organisational context of stroke unit nursing, to determine those features that staff perceived to be important in facilitating high quality care.                                                                                                                                                     | CASE STUDY         | INTERVIEWS                             | 2 ACUTE STROKE HOSPITAL UNITS                                          | CANADA                   | THEMATIC ANALYSIS                                       | AN OVERARCHING SERVICE MODEL TO GUIDE THE ORGANISATION OF CARE AND THE DEVELOPMENT OF SPECIALIST AND ADVANCED NURSING ROLES |

|    |                                                            |                                                                                                                                                                                                                                                     |                    |                                             |                                            |                          |                            |                                                                                |
|----|------------------------------------------------------------|-----------------------------------------------------------------------------------------------------------------------------------------------------------------------------------------------------------------------------------------------------|--------------------|---------------------------------------------|--------------------------------------------|--------------------------|----------------------------|--------------------------------------------------------------------------------|
| 11 | Chapman & Combs (2005)                                     | To identify how the Nurse Research Consultant position fulfilled the needs of emergency nurses in the area of research and development. The study also highlighted factors that impacted on the ED nurses' ability to utilise and conduct research. | QUALITATIVE DESIGN | SEMI-STRUCTURED INTERVIEWS                  | EMERGENCY DEPARTMENT                       | AUSTRALIA                | CONTENT ANALYSIS           | GENERAL                                                                        |
| 12 | Clignet, Meijel, Straten et al. (2017)                     | To describe the evaluation of the implementation of a nursing intervention, that is, the Systematic Activation Method (SAM), among inpatients with late life depression (LLD).                                                                      | QUALITATIVE DESIGN | QUESTIONNAIRES AND INTERVIEWS               | FOUR CLINICAL UNITS FOR OLD AGE PSYCHIATRY | THE NETHERLANDS          | THEMATIC CONTENT ANALYSIS  | EVALUATION OF THE IMPLEMENTATION OF A NURSING INTERVENTION IN ELDERLY PATIENTS |
| 13 | Cole, Esplin, & Baldwin (2015)                             | To adapt Systems of Support (SOS) for use in an evidence-based colorectal cancer screening program of the Federally Qualified Health Center system (FQHCs), guided by the Consolidated Framework for Implementation Research (CFIR).                | QUALITATIVE DESIGN | SEMI-STRUCTURED INTERVIEWS                  | 7 PRIMARY HEALTHCARE CENTRES               | UNITED STATES OF AMERICA | STAFF ANALYSIS             | EVIDENCE-BASED COLORECTAL CANCER SCREENING PROGRAMME                           |
| 14 | Cook, Meade, Hand, & McMullin (2002)                       | To understand the perspectives of intensive care unit clinicians regarding the determinants and consequences of semirecumbency.                                                                                                                     | QUALITATIVE DESIGN | SEMI-STRUCTURED INTERVIEWS AND FOCUS GROUPS | 3 INTENSIVE CARE UNITS                     | CANADA                   | INDUCTIVE CONTENT ANALYSIS | SEMIRECUMBENCY IN PATIENTS RECEIVING MECHANICAL VENTILATION                    |
| 15 | Curran et al. (2012)                                       | To determine the facilitators/barriers to implementing and sustaining the intervention (Coordinated Anxiety Learning and Management, CALM) in primary care clinics.                                                                                 | QUALITATIVE DESIGN | SEMI-STRUCTURED TELEPHONE INTERVIEWS        | PRIMARY CARE                               | UNITED STATES OF AMERICA | CONTENT ANALYSIS           | CALMA (COORDINATED ANXIETY LEARNING AND MANAGEMENT)                            |
| 16 | Dogherty, Harrison, Graham, Vandyk, & Keeping-Burke (2013) | To describe the tacit knowledge regarding facilitation embedded in the experiences of nurses implementing evidence into practice.                                                                                                                   | QUALITATIVE DESIGN | SYMPOSIUM                                   | NURSES FROM ACROSS CANADA                  | CANADA                   | INDUCTIVE CONTENT ANALYSIS | GENERAL                                                                        |

|    |                                                                 |                                                                                                                                                                                                                                                               |                         |                                           |                                                                                                       |                          |                               |                                                                                                |
|----|-----------------------------------------------------------------|---------------------------------------------------------------------------------------------------------------------------------------------------------------------------------------------------------------------------------------------------------------|-------------------------|-------------------------------------------|-------------------------------------------------------------------------------------------------------|--------------------------|-------------------------------|------------------------------------------------------------------------------------------------|
| 17 | Ebben, Vloet, Schalk, Mintjes-de Groot, & Van Achterberg (2014) | To gain an in-depth understanding of factors that influence ambulance and emergency nurses' adherence to protocols.                                                                                                                                           | QUALITATIVE DESIGN      | SEMI-STRUCTURED INTERVIEWS                | AMBULANCE AND EMERGENCY DEPARTMENTS                                                                   | THE NETHERLANDS          | CONTENT ANALYSIS              | AMBULANCE AND EMERGENCY PROTOCOLS                                                              |
| 18 | Espirito Santo & Choquette (2013)                               | To adapt and implement a skincare guideline to better prevent diaper dermatitis in the paediatric oncology population.                                                                                                                                        | MIXED DESIGN            | FOCUS GROUPS                              | DEPARTMENT OF PAEDIATRIC ONCOLOGY                                                                     | CANADA                   | CONSTANT COMPARATIVE METHOD   | A SKINCARE GUIDELINE TO BETTER PREVENT DIAPER DERMATITIS IN THE PAEDIATRIC ONCOLOGY POPULATION |
| 19 | Geense, Van De Glind, Visscher, & Van Achterberg (2013)         | To explore which lifestyle interventions Dutch general practitioners and practice nurses carry out in primary care, which barriers and facilitators can be identified and what main topics are with respect to attitudes towards health promoting activities. | QUALITATIVE DESIGN      | SEMI-STRUCTURED INTERVIEWS                | GENERAL PRACTICES AND PRIMARY HEALTHCARE CENTRES FROM 5 HEALTH REGIONS                                | THE NETHERLANDS          | CONTENT ANALYSIS              | EVIDENCE-BASED HEALTH PROMOTING ACTIVITIES                                                     |
| 20 | Gifford, Davies, Edwards, & Graham (2006)                       | To describe the leadership behaviours and activities that influenced nurses' use of clinical practice guidelines.                                                                                                                                             | GROUNDING THEORY        | INTERVIEWS                                | MEMBERS OF THE REGISTERED NURSES ASSOCIATION OF ONTARIO BEST PRACTICE GUIDELINES PROJECT (RNAO-BPG)   | OTTAWA (CANADA)          | CONSTANT COMPARATIVE ANALYSIS | CLINICAL PRACTICE GUIDELINE                                                                    |
| 21 | Gifford, Davies, Torangeau, & Lefebvre (2011)                   | To describe the planning and evaluation of a leadership intervention to facilitate nurses' use of guideline recommendations for diabetic foot ulcers in home health care.                                                                                     | MIXED DESIGN            | INTERVIEWS                                | HOME AND COMMUNITY HEALTH CARE ORGANISATION THAT DELIVERS NURSING CARE THROUGH APPROXIMATELY 20 UNITS | CANADA                   | CONTENT ANALYSIS              | GUIDELINE RECOMMENDATIONS FOR DIABETIC FOOT ULCERS IN HOME HEALTH CARE                         |
| 22 | Gifford, Zhang, Chen et al. (2018)                              | To explore barriers and facilitators to evidence-based practice in Hunan province, a less developed region in China.                                                                                                                                          | QUALITATIVE DESIGN      | SEMI-STRUCTURED INTERVIEWS                | COMMUNITY HOSPITAL AND THIRD-LEVEL HOSPITAL                                                           | CHINA (HUNAN)            | CONTENT ANALYSIS              | GENERAL                                                                                        |
| 23 | Goepp et al. (2008)                                             | To identify potential barriers to and facilitators of inpatient palliative care utilisation at a large urban hospital, as articulated by health professionals.                                                                                                | ETHNOGRAPHIC ASSESSMENT | INTERVIEWS INCLUDING OPEN-ENDED QUESTIONS | LARGE URBAN HOSPITAL                                                                                  | UNITED STATES OF AMERICA | DISCOURSE ANALYSIS            | PALLIATIVE CARE UTILISATION                                                                    |

|    |                                          |                                                                                                                                                                                                                                                                                                             |                        |                                                        |                                               |                                    |                   |                                                                    |
|----|------------------------------------------|-------------------------------------------------------------------------------------------------------------------------------------------------------------------------------------------------------------------------------------------------------------------------------------------------------------|------------------------|--------------------------------------------------------|-----------------------------------------------|------------------------------------|-------------------|--------------------------------------------------------------------|
| 24 | Graham, Logan, Davies, & Nimrod (2004)   | To explore factors influencing the successful (and unsuccessful) introduction of an evidence-based foetal health surveillance guideline.                                                                                                                                                                    | QUALITATIVE CASE STUDY | FOCUS GROUPS                                           | 1 COMMUNITY HOSPITAL AND 2 TERTIARY HOSPITALS | CANADA (ONTARIO)                   | THEMATIC ANALYSIS | EVIDENCE-BASED FOETAL HEALTH SURVEILLANCE GUIDELINE                |
| 25 | Hägglund & Olai (2017)                   | To describe staff perceptions of enabling and inhibitory factors that influenced implementation of evidence-based practice (EBP) for urinary incontinence in a nursing home.                                                                                                                                | QUALITATIVE DESIGN     | INDIVIDUAL SEMI-STRUCTURED INTERVIEWS AND FOCUS GROUPS | NURSING HOME                                  | SWEDEN                             | CONTENT ANALYSIS  | IMPLEMENTATION OF EVIDENCE-BASED PRACTICE FOR URINARY INCONTINENCE |
| 26 | Hains, Ward, & Pearson (2012)            | To evaluate eviQ use at the point-of-care and determine the factors impacting on its uptake and routine use in the first three years of operation.                                                                                                                                                          | MIXED DESIGN           | DISCUSSION GROUPS                                      | ONCOLOGY TREATMENT CENTRES                    | AUSTRALIA (MAINLY NEW SOUTH WALES) | CONTENT ANALYSIS  | WEB-BASED ONCOLOGY PROTOCOL SYSTEM (EVIQ)                          |
| 27 | Happell & Martin (2004)                  | To explore the impact of the implementation of a nursing clinical development unit program on outcomes for a period of time.                                                                                                                                                                                | QUALITATIVE DESIGN     | INTERVIEWS                                             | HOSPITAL NURSING CLINICAL DEVELOPMENT UNITS   | AUSTRALIA                          | CONTENT ANALYSIS  | IMPLEMENTATION OF NURSING CLINICAL DEVELOPMENT UNITS               |
| 28 | Harwood et al. (2007)                    | To examine the effect of a renal nursing professional practice model (PPM) on nurses' perceptions of empowerment, characteristics of practice environments and the impact on nursing care outcomes in a university-based teaching hospital in Canada.                                                       | MIXED DESIGN           | SEMI-STRUCTURED INTERVIEWS                             | HAEMODIALYSIS UNITS OF A UNIVERSITY HOSPITAL  | CANADA                             | CONTENT ANALYSIS  | RENAL NURSING PROFESSIONAL PRACTICE MODEL (PPM)                    |
| 29 | Helmle, Edwards, Kushniruk et al. (2018) | A qualitative evaluation of the perceived impact of a new evidence-informed electronic basal bolus insulin therapy order set on clinical workflow and practice, and exploration of potential barriers and facilitators to electronic basal bolus insulin order set uptake and use in acute care facilities. | QUALITATIVE DESIGN     | FOCUS GROUPS                                           | 3 ADULT ACUTE CARE FACILITIES                 | CANADA (CALGARY)                   | CONTENT ANALYSIS  | PROTOCOL FOR IMPROVING DIABETES CARE (BASAL BOLUS INSULIN THERAPY) |

|    |                                                  |                                                                                                                                                                                                                                                                           |                    |                            |                                                                                                                                                                                                    |                          |                   |                                                                                                                                                        |
|----|--------------------------------------------------|---------------------------------------------------------------------------------------------------------------------------------------------------------------------------------------------------------------------------------------------------------------------------|--------------------|----------------------------|----------------------------------------------------------------------------------------------------------------------------------------------------------------------------------------------------|--------------------------|-------------------|--------------------------------------------------------------------------------------------------------------------------------------------------------|
| 30 | Irwin, Bergman, & Richards (2013)                | To describe the experience of 19 teams of nurses from various healthcare settings who participated in the IEBPC program (Institute for Evidence-Based Practice Change).                                                                                                   | QUALITATIVE DESIGN | DISCUSSION GROUPS          | A WIDE RANGE OF CLINICAL PRACTICE AREAS AND DIFFERENT HEALTHCARE DEPARTMENTS OF HEALTH CARE ORGANISATIONS (COMMUNITY HOSPITAL, COMPREHENSIVE CANCER CENTRE, OUTPATIENTS, AND THE NURSING INDUSTRY) | UNITED STATES OF AMERICA | CONTENT ANALYSIS  | IEBPC PROGRAM                                                                                                                                          |
| 31 | Johnson, Levett-Jones, Langdon et al. (2018)     | To evaluate the perceptions of nurses of an e-learning educational program to encourage the use of behavioural strategies (blocking, engaging, mediating, multitasking, and preventing) to reduce the negative effects of interruptions during medication administration. | QUALITATIVE DESIGN | FOCUS GROUPS               | 2 HOSPITAL WARDS: PALLIATIVE CARE (TERMINALLY ILL PATIENTS) AND ACUTE CARE (AGED CARE)                                                                                                             | AUSTRALIA (SYDNEY)       | THEMATIC ANALYSIS | THE IMPACT OF AN E-LEARNING EDUCATIONAL PROGRAM TO ENCOURAGE THE USE OF BEHAVIOURAL STRATEGIES TO AVOID INTERRUPTIONS DURING MEDICATION ADMINISTRATION |
| 32 | Johnston, Coole, Narayanasamy et al. (2016)      | To identify barriers and facilitators to community nurses implementing research into practice.                                                                                                                                                                            | QUALITATIVE DESIGN | DISCUSSION GROUPS          | DISTRICT (COMMUNITY)                                                                                                                                                                               | ENGLAND                  | THEMATIC ANALYSIS | GENERAL                                                                                                                                                |
| 33 | Jones, Suurdt, Ouellette-Kuntz, & Heyland (2007) | To identify important barriers and enablers to implementation of nutrition support clinical practice guidelines.                                                                                                                                                          | CASE STUDIES       | SEMI-STRUCTURED INTERVIEWS | INTENSIVE CARE UNITS                                                                                                                                                                               | CANADA                   | THEMATIC ANALYSIS | NUTRITION SUPPORT CLINICAL PRACTICE GUIDELINES                                                                                                         |
| 34 | Kirk, Sivertsen, Petersen et al. (2016)          | To identify the factors that were perceived as most important as facilitators or barriers to the introduction and intended use of a new tool in the emergency department among nurses and a geriatric team.                                                               | QUALITATIVE DESIGN | SEMI-STRUCTURED INTERVIEWS | EMERGENCY DEPARTMENT OF A UNIVERSITY HOSPITAL                                                                                                                                                      | DENMARK                  | CONTENT ANALYSIS  | SCREENING TOOL AIMING TO IDENTIFY PATIENTS AT PARTICULARLY HIGH RISK OF FUNCTIONAL DECLINE AND READMISSION                                             |

|    |                                              |                                                                                                                                                                                                                                                                                         |                                 |                                                                                           |                                               |                                 |                                                      |                                                     |
|----|----------------------------------------------|-----------------------------------------------------------------------------------------------------------------------------------------------------------------------------------------------------------------------------------------------------------------------------------------|---------------------------------|-------------------------------------------------------------------------------------------|-----------------------------------------------|---------------------------------|------------------------------------------------------|-----------------------------------------------------|
| 35 | Koivunen, Hätönen, & Välimäki (2008)         | To identify barriers and facilitators influencing the implementation of an interactive Internet-portal application for patient education in psychiatric hospitals.                                                                                                                      | QUALITATIVE DESIGN              | QUESTIONNAIRE WITH OPEN-ENDED QUESTIONS                                                   | 9 ACUTE PSYCHIATRIC WARDS FROM 2 HOSPITALS    | FINLAND                         | CONTENT ANALYSIS                                     | INTERACTIVE INTERNET-PORTAL APPLICATION             |
| 36 | Kolltveit, Gjengedal, Graue et al. (2017)    | To identify perceptions of healthcare professionals in different working settings with respect to facilitators to engagement and participation in the application of telemedicine.                                                                                                      | QUALITATIVE DESIGN              | FOCUS GROUPS                                                                              | PRIMARY CARE AND HOSPITAL OUTPATIENT SETTINGS | NORWAY                          | INTERPRETIVE DESCRIPTION                             | TELEMEDICINE IN DIABETES FOOT CARE                  |
| 37 | Ladak et al. (2013)                          | To describe the expectations regarding pain resource nurses' (PRNs) roles in our facilities; to describe what contributes to role clarity for PRNs; to describe role conflicts regarding the role of PRNs; and to describe future role expectations and role development needs of PRNs. | GROUNDING THEORY                | FOCUS GROUPS AND SEMI-STRUCTURED INTERVIEWS                                               | THREE-SITE ACADEMIC HEALTH SCIENCE CENTER     | CANADA                          | CONSTANT COMPARATIVE ANALYSIS                        | PAIN ASSESSMENT AND MANAGEMENT PROGRAMME FOR NURSES |
| 38 | Malik, McKenna, & Plummer (2016)             | To report findings from a descriptive study exploring nurse educators', clinical coaches' and nurse specialists' perceptions of factors associated with using evidence-based practice (EBP).                                                                                            | MIXED DESIGN                    | QUESTIONNAIRES                                                                            | TERTIARY HEALTH CARE CENTRES                  | AUSTRALIA (VICTORIA)            | THEMATIC ANALYSIS                                    | A VARIETY OF ACTIVITIES                             |
| 39 | Martin et al. (2007)                         | To explore the experiences of clinical staff who implemented a research intervention: the Transitional Discharge Model (TDM).                                                                                                                                                           | ETHNOGRAPHIC QUALITATIVE DESIGN | DISCUSSION GROUPS AND FIELD NOTES                                                         | PSYCHIATRIC HOSPITALS                         | CANADA (ONTARIO)                | LEININGER'S PHASES OF ETHNONURSING (Leininger, 2002) | TRANSITIONAL DISCHARGE MODEL (TDM)                  |
| 40 | Matthew-Maich, Ploeg, Dobbins, & Jack (2013) | To explore the processes involved in the uptake of best practice guidelines on breastfeeding in three acute care hospitals, as well as the impact of their implementation on clients and professionals.                                                                                 | GROUNDING THEORY                | SEMI-STRUCTURED INTERVIEWS, FIELD NOTES, DEMOGRAPHIC QUESTIONNAIRES, AND DOCUMENT REVIEWS | 3 ACUTE CARE HOSPITALS                        | CANADA                          | CONSTANT COMPARATIVE ANALYSIS                        | BEST PRACTICE GUIDELINES ON BREASTFEEDING           |
| 41 | McAlearney & Hefner (2014)                   | To determine if infection control professionals and frontline staff have different perspectives about the facilitators and challenges of central line-associated bloodstream infection (CLABSI) prevention program success.                                                             | QUALITATIVE DESIGN              | INTERVIEWS                                                                                | 8 HOSPITALS                                   | UNITED STATES OF AMERICA (OHIO) | THEMATIC ANALYSIS                                    | BLOODSTREAM INFECTION PREVENTION PROGRAM            |



|    |                                                                 |                                                                                                                                                                                                                                   |                                |                                                                                   |                                                                                       |                  |                                           |                                                                                                                                                                                                |
|----|-----------------------------------------------------------------|-----------------------------------------------------------------------------------------------------------------------------------------------------------------------------------------------------------------------------------|--------------------------------|-----------------------------------------------------------------------------------|---------------------------------------------------------------------------------------|------------------|-------------------------------------------|------------------------------------------------------------------------------------------------------------------------------------------------------------------------------------------------|
| 42 | Moreno-Poyato, Delgado-Hito, Leyva-Moral et al. (2019)          | To produce changes in the therapeutic relationship between clinical practice nurses and patients in psychiatric units by implementing evidence-based practices through participatory action research.                             | PARTICIPATORY ACTION           | FOCUS GROUPS                                                                      | TWO PSYCHIATRIC UNITS OF A THIRD-LEVEL UNIVERSITY HOSPITAL                            | SPAIN            | CONTENT ANALYSIS                          | EVIDENCE THAT HAD BEEN STUDIED AND PREVIOUSLY PROPOSED                                                                                                                                         |
| 43 | Ploeg, Davies, Edwards, Gifford et al. (2007)                   | To report the perceptions of administrators, staff, and project leaders about factors influencing implementation of nursing best practice guidelines.                                                                             | QUALITATIVE DESIGN             | SEMI-STRUCTURED TELEPHONE INTERVIEWS                                              | CUTE, COMMUNITY, AND LONG-TERM CARE SETTINGS                                          | CANADA (ONTARIO) | THEMATIC ANALYSIS                         | 7 GUIDELINES (CLIENT-CENTRED CARE, CRISIS INTERVENTION, HEALTHY ADOLESCENT DEVELOPMENT, PAIN ASSESSMENT, PRESSURE ULCERS, SUPPORTING AND STRENGTHENING FAMILIES AND THERAPEUTIC RELATIONSHIPS) |
| 44 | Raña-Lama, Saleta-Canosa, Rumbo-Prieto, & Aranton-Areosa (2016) | To understand the perception of nursing professionals regarding the factors that favour or hinder the application of leg compression therapy in patients with uncomplicated venous ulcers.                                        | MIXED DESIGN                   | QUESTIONNAIRE INCLUDING ELEMENTS FACILITATING THE DELIVERY OF THERAPY             | NATIONAL ADVISORY GROUP FOR THE STUDY OF PRESSURE ULCERS AND CHRONIC WOUNDS (GNEAUPP) | SPAIN            | CONTENT ANALYSIS                          | DELIVERY OF COMPRESSION THERAPY FOR VENOUS LEG ULCERS                                                                                                                                          |
| 45 | Roberts, McInnes, Wallis et al. (2016)                          | To assess nurses' perceptions of the usefulness and impact of a pressure ulcer prevention care bundle (PUPCB) intervention on clinical practice as part of a process evaluation for the main trial.                               | QUALITATIVE DESCRIPTIVE DESIGN | SEMI-STRUCTURED INTERVIEWS                                                        | 4 HOSPITALS                                                                           | AUSTRALIA        | THEMATIC ANALYSIS                         | PRESSURE ULCER PREVENTION CARE BUNDLE                                                                                                                                                          |
| 46 | Sánchez (2014)                                                  | To understand the meaning of nurses' experiences regarding the application of evidence in their care practice and the process of change perceived in their professional paths towards the evidence-based clinical practice model. | QUALITATIVE DESIGN             | SEMI-STRUCTURED FACE-TO-FACE AND ONLINE INTERVIEWS (USING BLOGS), AND FIELD NOTES | HOSPITALS, PRIMARY CARE, AND UNIVERSITIES                                             | SPAIN            | PHENOMENOLOGICAL AND HERMENEUTIC ANALYSIS | GENERAL                                                                                                                                                                                        |

|    |                                                       |                                                                                                                                                                                                                                                                                                    |                                |                                        |                                             |                             |                   |                                                          |
|----|-------------------------------------------------------|----------------------------------------------------------------------------------------------------------------------------------------------------------------------------------------------------------------------------------------------------------------------------------------------------|--------------------------------|----------------------------------------|---------------------------------------------|-----------------------------|-------------------|----------------------------------------------------------|
| 47 | Sanders et al. (2010)                                 | To provide a background in the use of evidence-based practices (EBPs), to report the facilitators and barriers to overall implementation of evidence-based pain practices in the hospice setting, and to provide recommendations for hospices interested in improving use of EBPs in this setting. | QUALITATIVE DESIGN             | INTERVIEWS AND FOCUS GROUPS            | PALLIATIVE CARE HOSPICES                    | UNITED STATES OF AMERICA    | CONTENT ANALYSIS  | TRANSLATING RESEARCH INTO PRACTICE (TRIP) INTERVENTION   |
| 48 | Simpson, Stevens & Kovach (2007)                      | To describe nurses' experience with the clinical application of a research-based nursing protocol (The Serial Trial Intervention) within a long-term care setting.                                                                                                                                 | QUALITATIVE DESCRIPTIVE DESIGN | SEMI-STRUCTURED INTERVIEWS             | NURSING HOMES                               | UNITED STATES OF AMERICA    | CONTENT ANALYSIS  | PROTOCOL (THE SERIAL TRIAL INTERVENTION)                 |
| 49 | Stacey, Pomey, O'Connor, & Graham (2006)              | To describe call centre nurses' adoption of a decision support protocol into practice following exposure to an implementation intervention and to identify factors influencing sustainable nursing practice changes.                                                                               | CASE STUDY                     | INTERVIEWS AND FOCUS GROUPS            | HEALTH CALL CENTRES (24 HOURS A DAY)        | CANADA                      | CONTENT ANALYSIS  | PROTOCOL (PATIENT DECISION SUPPORT INTERVENTIONS)        |
| 50 | Stecksen, Lundman, Eriksson, Glader, & Asplund (2014) | To identify facilitators of and barriers to the implementation of national guidelines on thrombolytic therapy for acute ischemic stroke.                                                                                                                                                           | QUALITATIVE DESIGN             | SEMI-STRUCTURED INTERVIEWS             | 9 HOSPITALS                                 | SWEDEN                      | CONTENT ANALYSIS  | THROMBOLYTIC THERAPY FOR ACUTE ISCHEMIC STROKE           |
| 51 | Stevens et al. (2011)                                 | To explore health care professionals' perceptions of the influence of context (i.e., organizational culture, structure, resources, capabilities/competencies, and politics) on evidence-based newborn pain practices.                                                                              | QUALITATIVE DESIGN             | DISCUSSION GROUPS                      | 3 NEONATAL INTENSIVE CARE UNITS (NICUS)     | CENTRAL AND EASTERN CANADA  | CONTENT ANALYSIS  | EVIDENCE-BASED PAIN PRACTICES                            |
| 52 | Storm-Versloot et al. (2012)                          | To find out whether a successful multifaceted implementation approach of a local evidence-based guideline on postoperative body temperature measurements (BTM) was persistent over time, and which factors influenced long-term adherence.                                                         | MIXED DESIGN                   | FOCUS GROUPS, FIELD NOTES, AND PLENARY | SURGERY DEPARTMENT OF A UNIVERSITY HOSPITAL | THE NETHERLANDS (AMSTERDAM) | THEMATIC ANALYSIS | GUIDELINE ON POSTOPERATIVE BODY TEMPERATURE MEASUREMENTS |
| 53 | Sving, Fredriksson, Gunningberg et al. (2017)         | To describe registered nurses', assistant nurses' and first-line managers' experiences and perceptions of a multifaceted hospital setting intervention focused on implementing evidence-based pressure ulcer prevention.                                                                           | QUALITATIVE DESCRIPTIVE DESIGN | INTERVIEWS AND FOCUS GROUPS            | HOSPITAL (5 UNITS)                          | SWEDEN                      | CONTENT ANALYSIS  | PRESSURE ULCER PREVENTION: IMPLEMENTATION PROCESS        |

|    |                                   |                                                                                                                                                                                                                                                     |                                                  |                                                                                                 |                                                                                                                          |                          |                  |                                                                                                   |
|----|-----------------------------------|-----------------------------------------------------------------------------------------------------------------------------------------------------------------------------------------------------------------------------------------------------|--------------------------------------------------|-------------------------------------------------------------------------------------------------|--------------------------------------------------------------------------------------------------------------------------|--------------------------|------------------|---------------------------------------------------------------------------------------------------|
| 54 | Thomason et al. (2007)            | To assess providers' perceptions for each of the 32 clinical practice guideline (CPG) recommendations regarding their agreement with CPGs, degree of CPG implementation, and CPG implementation barriers and facilitators.                          | MIXED DESIGN                                     | FOCUS GROUPS                                                                                    | ANNUAL NATIONAL CONFERENCES OF THE AMERICAN PARAPLEGIA SOCIETY AND THE AMERICAN ASSOCIATION OF SPINAL CORD INJURY NURSES | UNITED STATES OF AMERICA | CONTENT ANALYSIS | CLINICAL PRACTICE GUIDELINES FOR PRESSURE ULCER PREVENTION AND TREATMENT AFTER SPINAL CORD INJURY |
| 55 | Varaei, Salsali & Cheraghi (2013) | To explore nurses' experiences and perceptions about evidence-based nursing practice in giving care to patients with diabetic foot ulcers.                                                                                                          | QUALITATIVE DESIGN                               | SEMI-STRUCTURED INTERVIEWS                                                                      | UNIVERSITY HOSPITAL                                                                                                      | IRAN                     | CONTENT ANALYSIS | CARE TO PATIENTS WITH DIABETIC FOOT ULCERS                                                        |
| 56 | Vikström et al. (2015)            | To describe a model for implementing national evidence-based guidelines for care of persons with dementia in nursing homes. The secondary aim is to outline the nursing home staff experiences during the first year of the implementation process. | PARTICIPATORY ACTION                             | REFLECTIVE SEMINARS AND POSTER EXHIBITIONS                                                      | NURSING HOMES                                                                                                            | SWEDEN (STOCKHOLM)       | CONTENT ANALYSIS | MODEL FOR IMPLEMENTING EVIDENCE-BASED GUIDELINES FOR CARE OF PERSONS WITH DEMENTIA                |
| 57 | Zadvinskis, Garvey, & Yen (2018)  | To explore nurses' experience regarding implementation of health information technology (HIT) over time.                                                                                                                                            | PHENOMENOLOGICAL LONGITUDINAL QUALITATIVE DESIGN | SEMI-STRUCTURED INTERVIEWS (FOCUSING ON THREE TIME POINTS AFTER IMPLEMENTATION) AND FIELD NOTES | MEDICAL-SURGICAL UNIT IN AN ACADEMIC CENTER                                                                              | UNITED STATES OF AMERICA | CONTENT ANALYSIS | IMPLEMENTATION OF HEALTH INFORMATION TECHNOLOGY (HIT)                                             |
